# Supplementary material for: TBX3 is essential for establishment of the posterior boundary of anterior genes and upregulation of posterior genes together with HAND2 during the onset of limb bud development
Source: PubMed Central journal article supplement (PMC11190573; doi:10.1242/dev.202722), 2024-06-03
Supplement: develop-151-202722-s1.pdf [file develop-151-202722-s1.pdf]

**A**

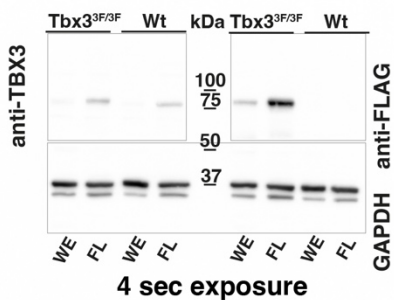

**D**

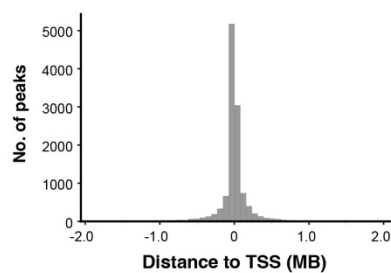

**B**

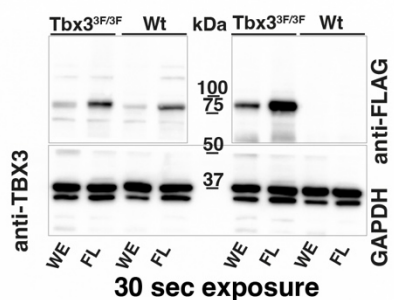

**E**

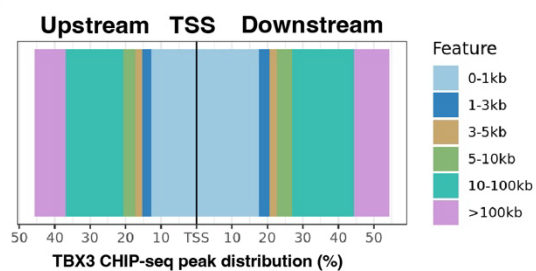

**C**

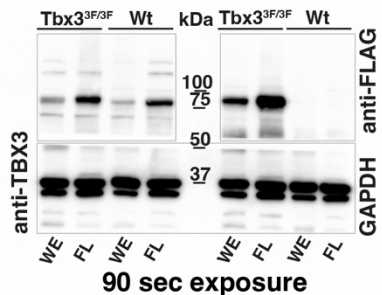

**F**

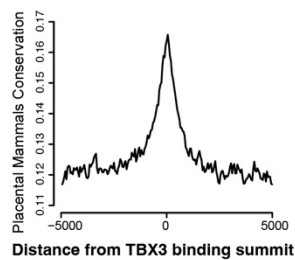

**Fig. S1. Identification of the TBX3 cistrome using a novel mouse *Tbx3*<sup>3xFLAG</sup> allele.**

(A-C) Originals for the Western blot analysis shown in Fig. 1B. After transfer, the Western blot membrane was cut in 3 pieces (indicated by solid lines) prior detection of TBX3 proteins and GAPDH as a loading control.  $\alpha$ TBX3 detects both the mouse wildtype and TBX3<sup>3xFLAG</sup> proteins (top left panel). The monoclonal M2  $\alpha$ FLAG antibodies specifically detect the TBX3<sup>3xFLAG</sup> protein (top right panel). The lower panel shows GAPDH protein levels as loading control for all lanes. For detection, the 3 pieces were realigned and exposed together for 4 seconds (panel A), 30 seconds (panel B) and 90 seconds (panel C). WE: whole embryo; FL: forelimb buds. (D) Histogram shows distance distribution of the verified genomic regions enriched in TBX3 chromatin complexes with respect to the nearest transcriptional start site (TSS) at E9.75-E10.25 (28-32 somites). (E) Plot showing the fraction (%) of the TBX3<sup>3xF</sup> ChIP-seq peak distributions in relation to their distance from TSS. (F) Conservation analysis of the genomic regions enriched in TBX3 ChIP-seq using Phastcons conservation scores. Shown is the average Phastcons conservation of the TBX3-bound genomic regions (n=11,422) identified by ChIP-seq analysis.

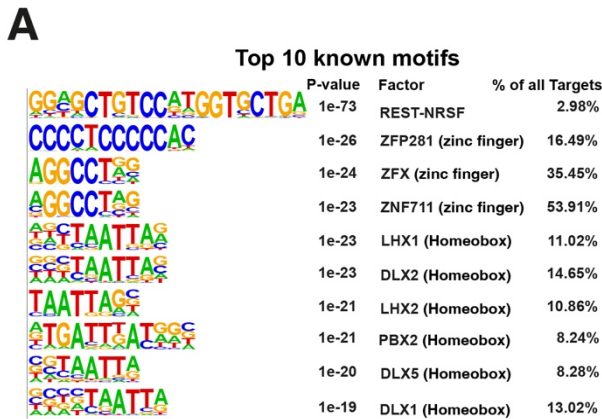

**B**

| Tbox-TFs | motif sequence | motif description                                                              |
|----------|----------------|--------------------------------------------------------------------------------|
| Eomes    |                | PB0117.1_Eomes_2/Jaspar<br>Score: 0.90<br>Rank: 1                              |
| Tbx5     |                | Tbx5(T-box)/HL1-Tbx5,biotin-ChIP-Seq(GSE21529)/Homer<br>Score: 0.86<br>Rank: 2 |
| Tbx3     |                | TBX3/MA1566.1/Jaspar<br>Score: 0.83<br>Rank: 3                                 |
| Tbx6     |                | TBX6/MA1567.1/Jaspar<br>Score: 0.82<br>Rank: 4                                 |
| Tbx4     |                | TBX4/MA0806.1/Jaspar<br>Score: 0.78<br>Rank: 7                                 |
| Tbx2     |                | TBX2/MA0688.1/Jaspar<br>Score: 0.75<br>Rank: 8                                 |
| Tbet     |                | Tbet(T-box)/CD8-Tbet-ChIP-Seq(GSE33802)/Homer<br>Score: 0.75<br>Rank: 10       |

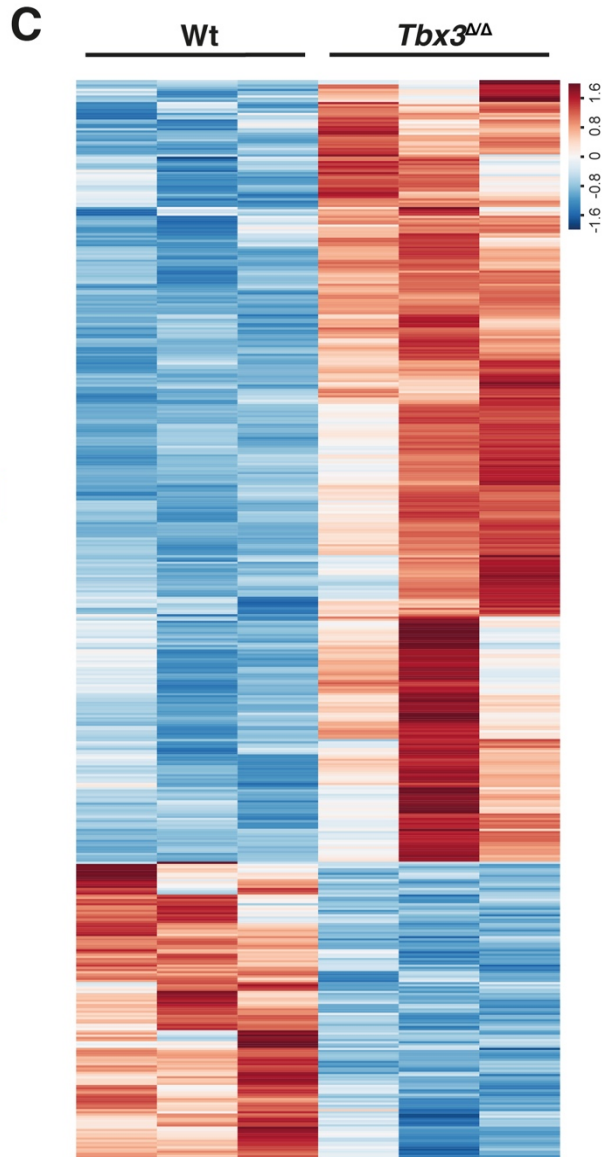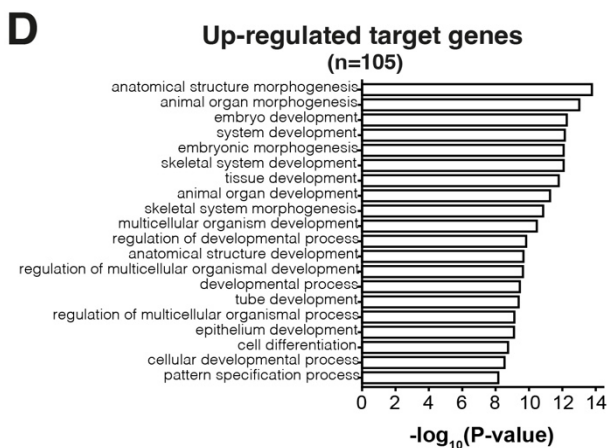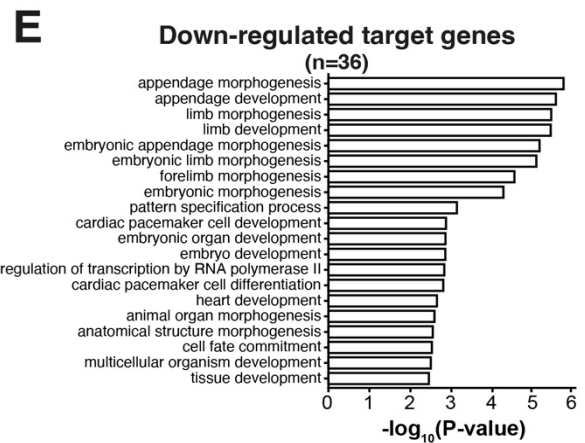

**Fig. S2. TBX3 binding motif analysis and differentially expressed genes in *Tbx3* deficient limb buds (E9.75-10.0)** (A) Top known motif analysis of genomic regions enriched in TBX3 chromatin complexes and accessible in mouse embryos forelimb buds at E9.75-10.25. (B) HOMER de novo motif analysis reveals the high score ( $x > 0.7$ ) T-box motifs enriched by ChIP-seq analysis and shows the similarities of the binding motif sequences identified for different TBX transcription factors. (C) Heatmap of all DEGs ( $n=494$ ) at E9.75-10.0 (28-31 somites) illustrating their relative gene expression ratios across wild-type and *Tbx3*-deficient forelimb buds ( $n=3$  biological replicates). Only DEGs with an absolute fold-change (FC) cutoff of  $\geq 1.2$  and an adjusted  $p$  value  $\leq 0.05$  were considered significantly changed. Among these 494 DEGs, 357 are up-regulated and 137 DEGs are down-regulated. The z-score scale represents mean-subtracted regularized log-transformed read counts. (D) Top enriched ( $n=20$ ) biological processes identified by gene ontology (GO) analysis for the up-regulated TBX3 target genes ( $n=105$ ). (E) Top enriched ( $n=20$ ) biological processes identified by GO analysis for the down-regulated TBX3 target genes ( $n=36$ ). DEG: differentially expressed gene.



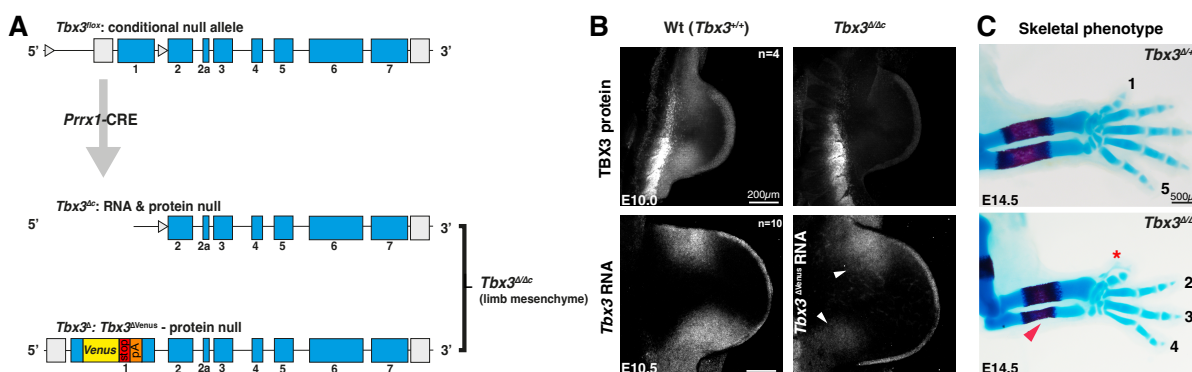

**Fig. S3. The different *Tbx3* alleles used for analysis.** (A) Scheme illustrating the generation of *Tbx3*<sup>Δ/Δc</sup> mouse embryos, in which *Tbx3* is conditionally inactivated in the limb bud mesenchyme using a *Prrx1-Cre* driver. The LoxP sites are indicated by open arrow heads. Conditionally deleting one *Tbx3*<sup>loxP</sup> in the context of the *Tbx3*<sup>Δc</sup> allele results in rapid clearance of the TBX3 protein (panel B). (B) Top panels immunofluorescence analysis show the clearance of TBX3 proteins from *Tbx3*<sup>Δ/Δc</sup> forelimb buds by E10.0 (29 – 33 somites, n=4). Bottom panels: HCR<sup>TM</sup> detection of *Tbx3* mRNAs in wild-type and *Tbx3*<sup>Δ/Δc</sup> forelimb buds (n≥4). The HCR<sup>TM</sup> probe set detects the *Tbx3* protein-null transcript in *Tbx3*<sup>Δ/Δc</sup> forelimb buds at variable levels (indicated by white arrow heads, E10.5, 34-36 somites). White arrows indicate the remaining *Tbx3* mRNA signal. Scale bar: 200μm. (C) Skeletal morphology of *Tbx3*<sup>Δ/Δc</sup> forelimbs at E14.5 shows the classical *Tbx3* mutant limb skeletal phenotype. The asterisk indicates the duplication of digit 1 and digit 5 is lost (shown here) or hypoplastic. The red arrow points to the hypoplastic ulna. Scale bar: 500μm.

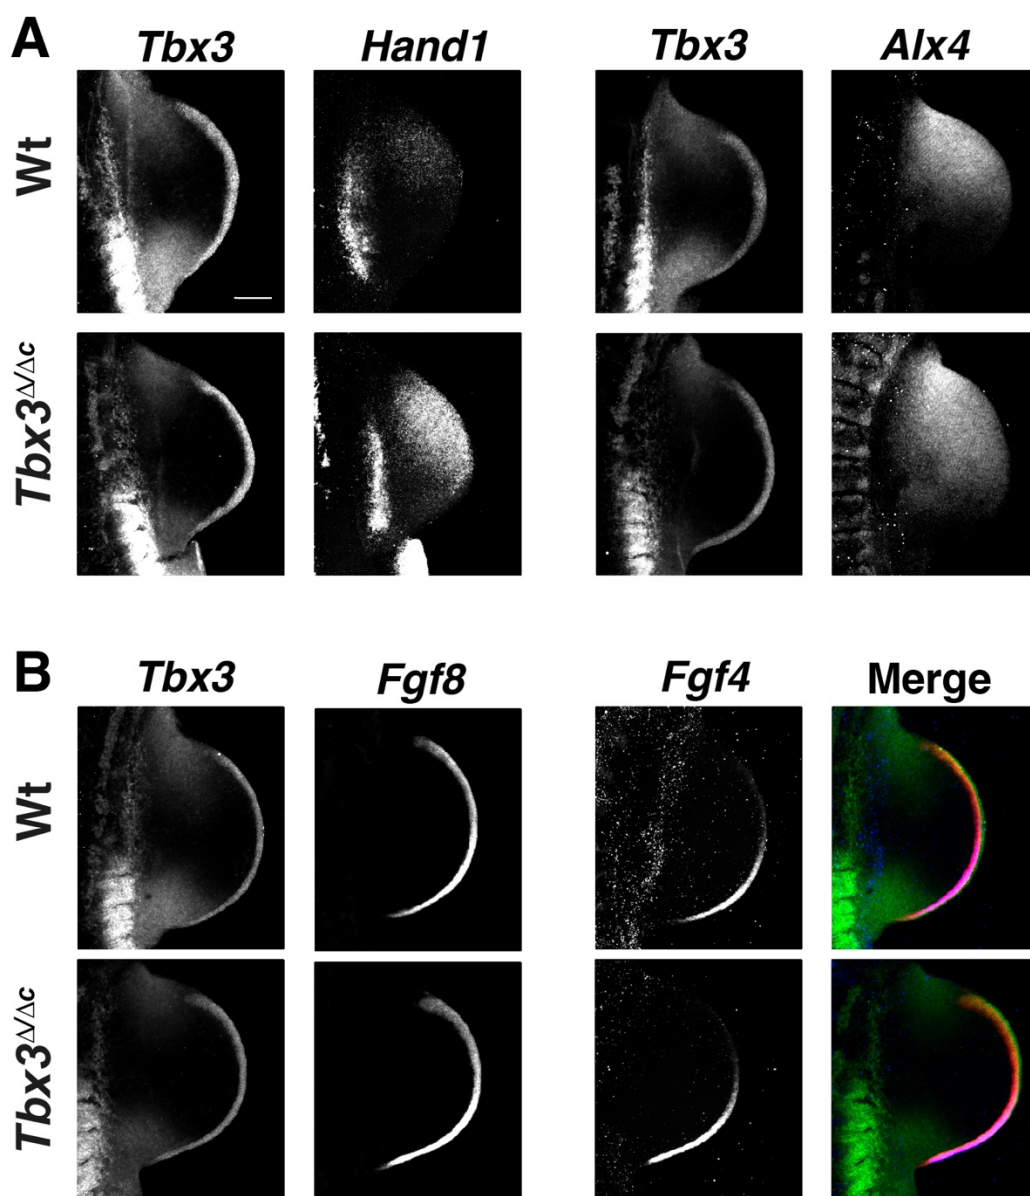

**Fig. S4. AER-*Fgf* expression and posterior expansion of *Hand1* and *Alx4* expression in *Tbx3*<sup>Δ/Δc</sup> forelimbs.** (A) Spatial expression of *Tbx3*, *Hand1* and *Alx4* in wildtype and *Tbx3*<sup>Δ/Δc</sup> forelimb buds (E10.0, 29-32 somites). n=5 biological replicates were analysed per gene and genotype. (B) Spatial expression of *Tbx3* (green), *Fgf8* (red) and *Fgf4* (blue) in wildtype and *Tbx3*<sup>Δ/Δc</sup> forelimb buds (E10.0, 29-32 somites). n=3 biological replicates were analysed per gene and genotype Scalebar: 200μm.

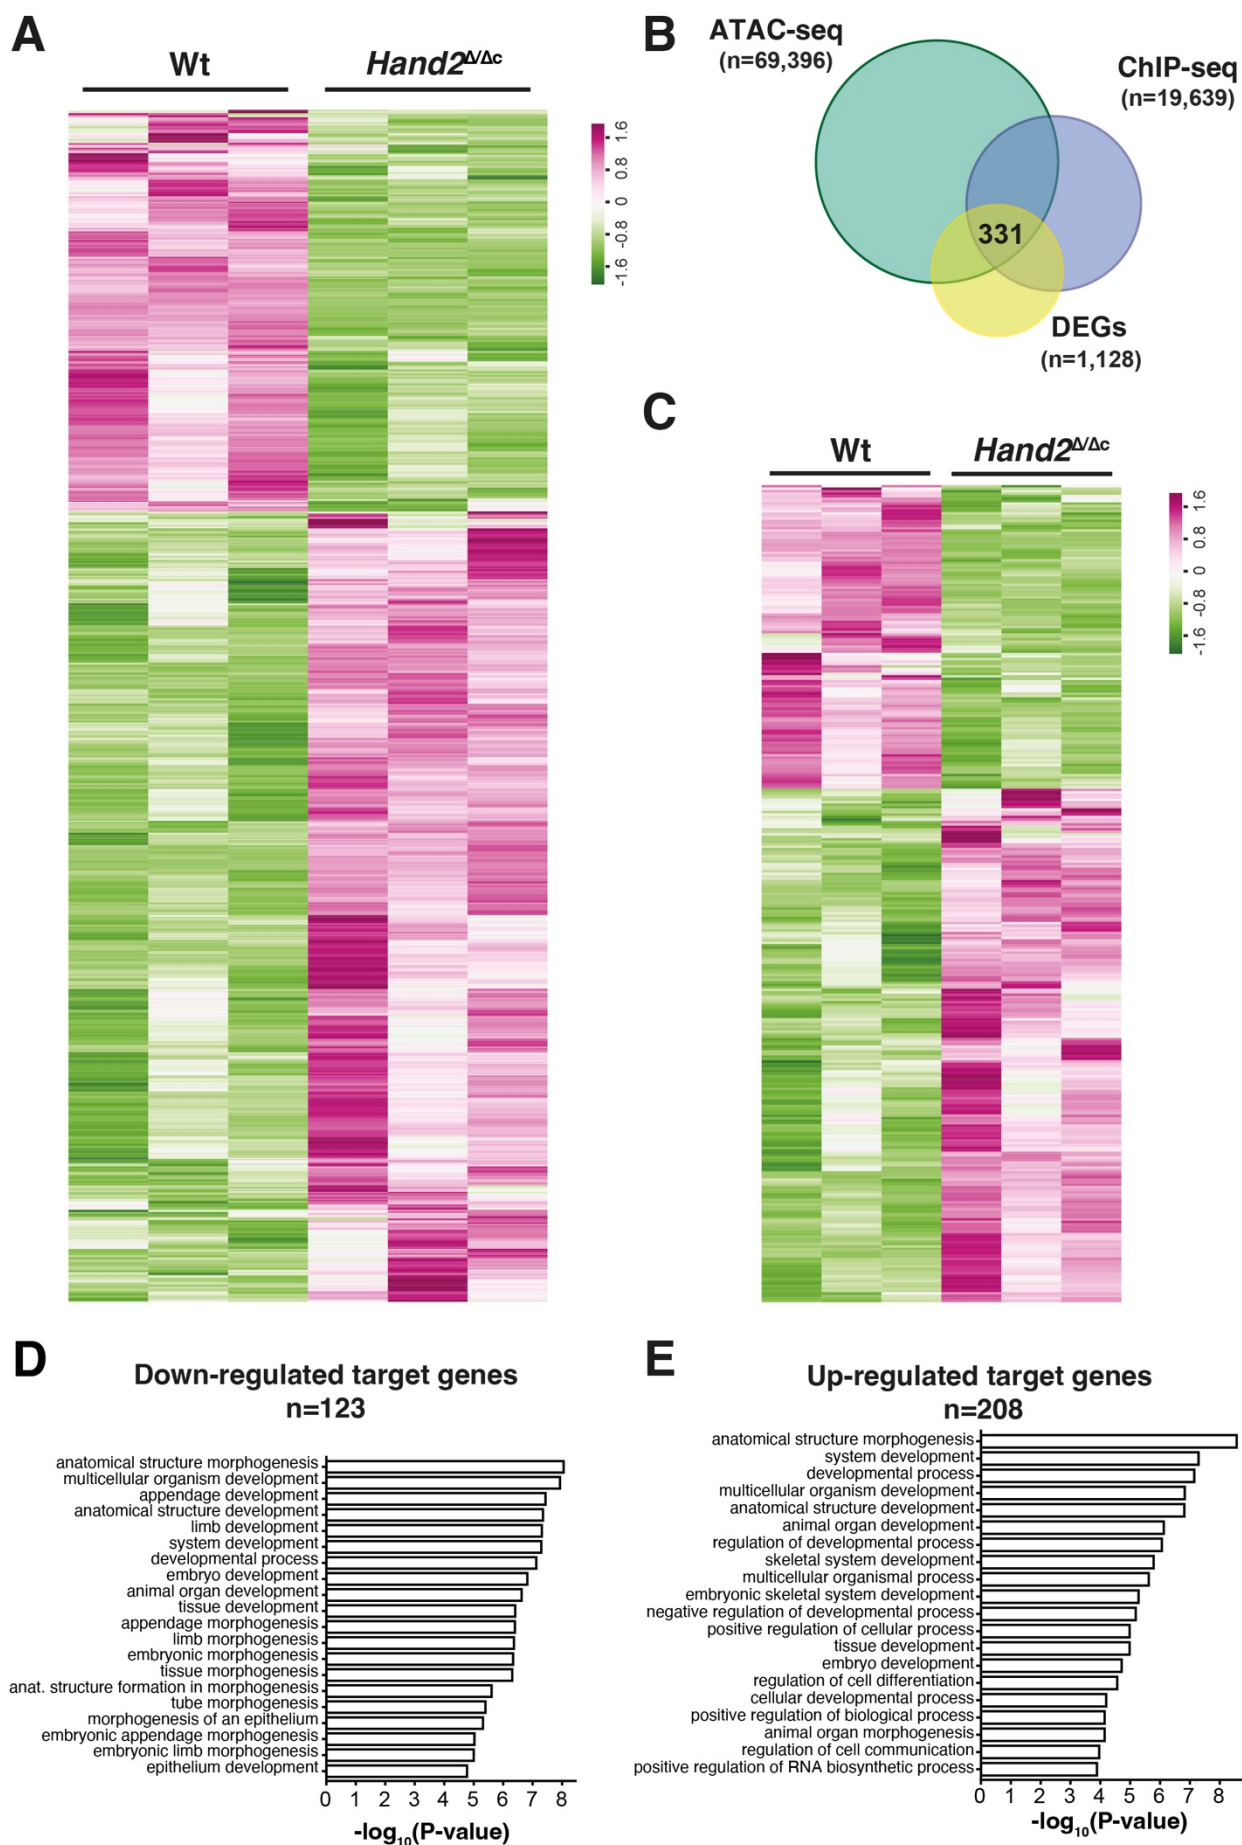

**Fig. S5. Identification of differentially expressed HAND2 target genes in mouse forelimb buds.** (A) Heatmap of DEGs (n = 1128; down-regulated: 380, up-regulated: n=748) in wild-type and *Hand2*<sup>Δ/Δc</sup> forelimb buds (E10-10.25, 29-32 somites, n=3 biological replicates per genotypes). DEGs with significant changes in transcript levels must have an absolute FC cutoff of  $\geq 1.2$  and an adjusted *p* value  $\leq 0.05$ . The z-score scale represents mean-subtracted regularized log-transformed read counts. (B) Shown is the intersection between the significantly enriched HAND2-bound regions (ChIP-seq, Osterwalder et al., 2014), open chromatin regions (ATAC-seq, E9.75) and differentially expressed genes (DEGs) between wild-type and *Hand2*-deficient samples (RNA-seq, E10-10.25). A total of 331 HAND2 candidate gene targets are identified in the mouse forelimb buds. (C) Heatmap illustrating the relative gene expression of candidate gene targets of HAND2 (n=331) that showed significant changes (absolute FC cutoff of  $\geq 1.2$  and an adjusted *p* value  $\leq 0.05$ ) between wild-type and *Hand2*-deficient samples during RNA-seq analysis. The z-score scale represents mean-subtracted regularized log-transformed read counts. (D) Top (n=20) enriched biological processes identified by GO analysis of up-regulated target genes (n=208) of HAND2. (E) Top (n=20) enriched biological processes identified by GO analysis of down-regulated target genes (n=123) of HAND2. DEG: differentially expressed genes, GO: gene ontology.

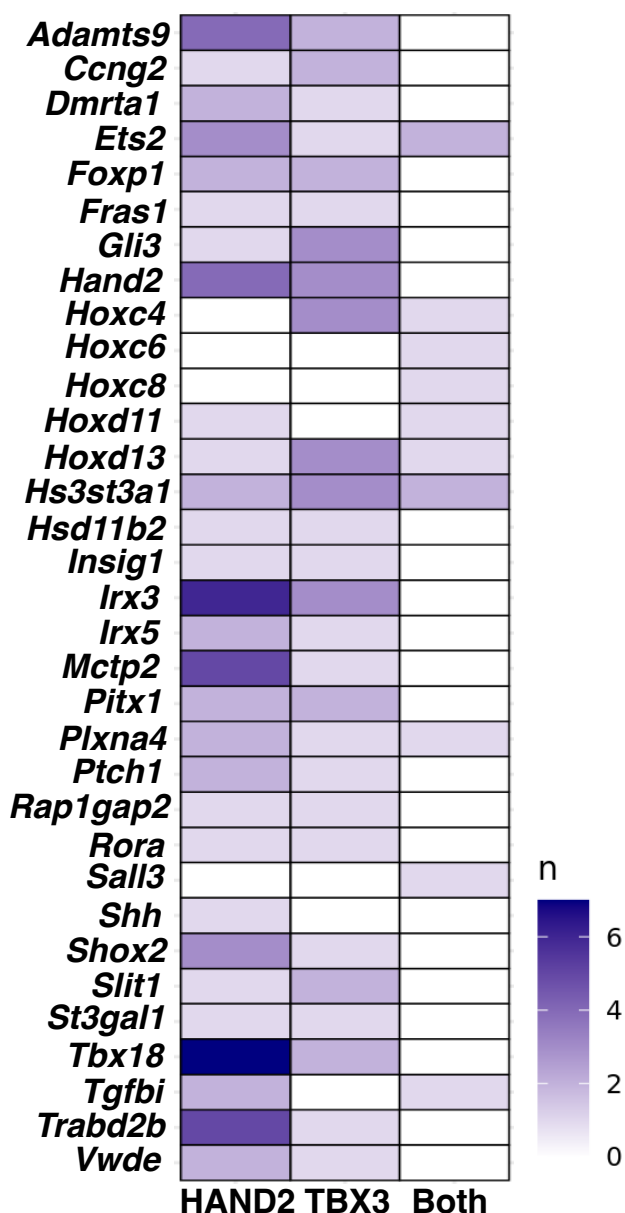

**Fig. S6. Interaction of HAND2 and TBX3 chromatin complexes with CRMs in shared target genes.** The heatmap shows the number of CRMs enriched in either HAND2 or TBX3 chromatin complexes and the number CRMs bound by both TFs (both) for each of the shared target genes.

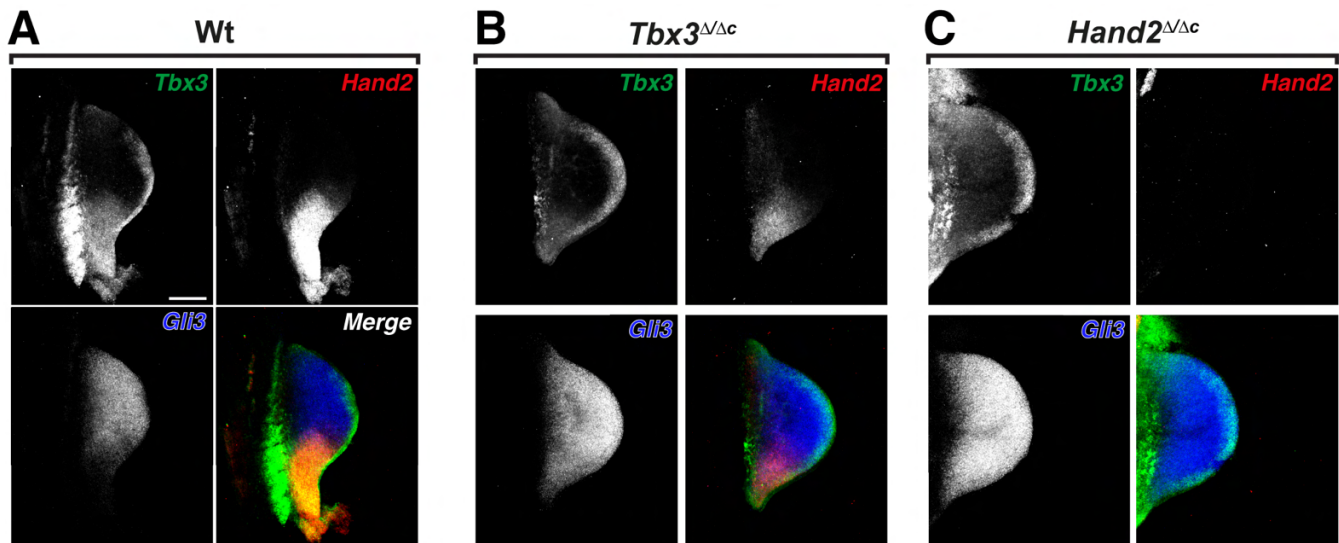

**Fig. S7. *Tbx3* is required to restrict *Gli3* from the posterior mesenchyme and posterior *Tbx3* expression is lost in *Hand2*<sup>Δ/Δc</sup> forelimb buds.** (A-C) HCR<sup>TM</sup> analysis of the *Tbx3*, *Hand2* and *Gli3* expression in wild-type (panel A), *Tbx3*<sup>Δ/Δc</sup> (panel B) and *Hand2*<sup>Δ/Δc</sup> forelimb buds (panel C) at E10.0 (29-32 somites). n=3. Scale bar: 200μm.



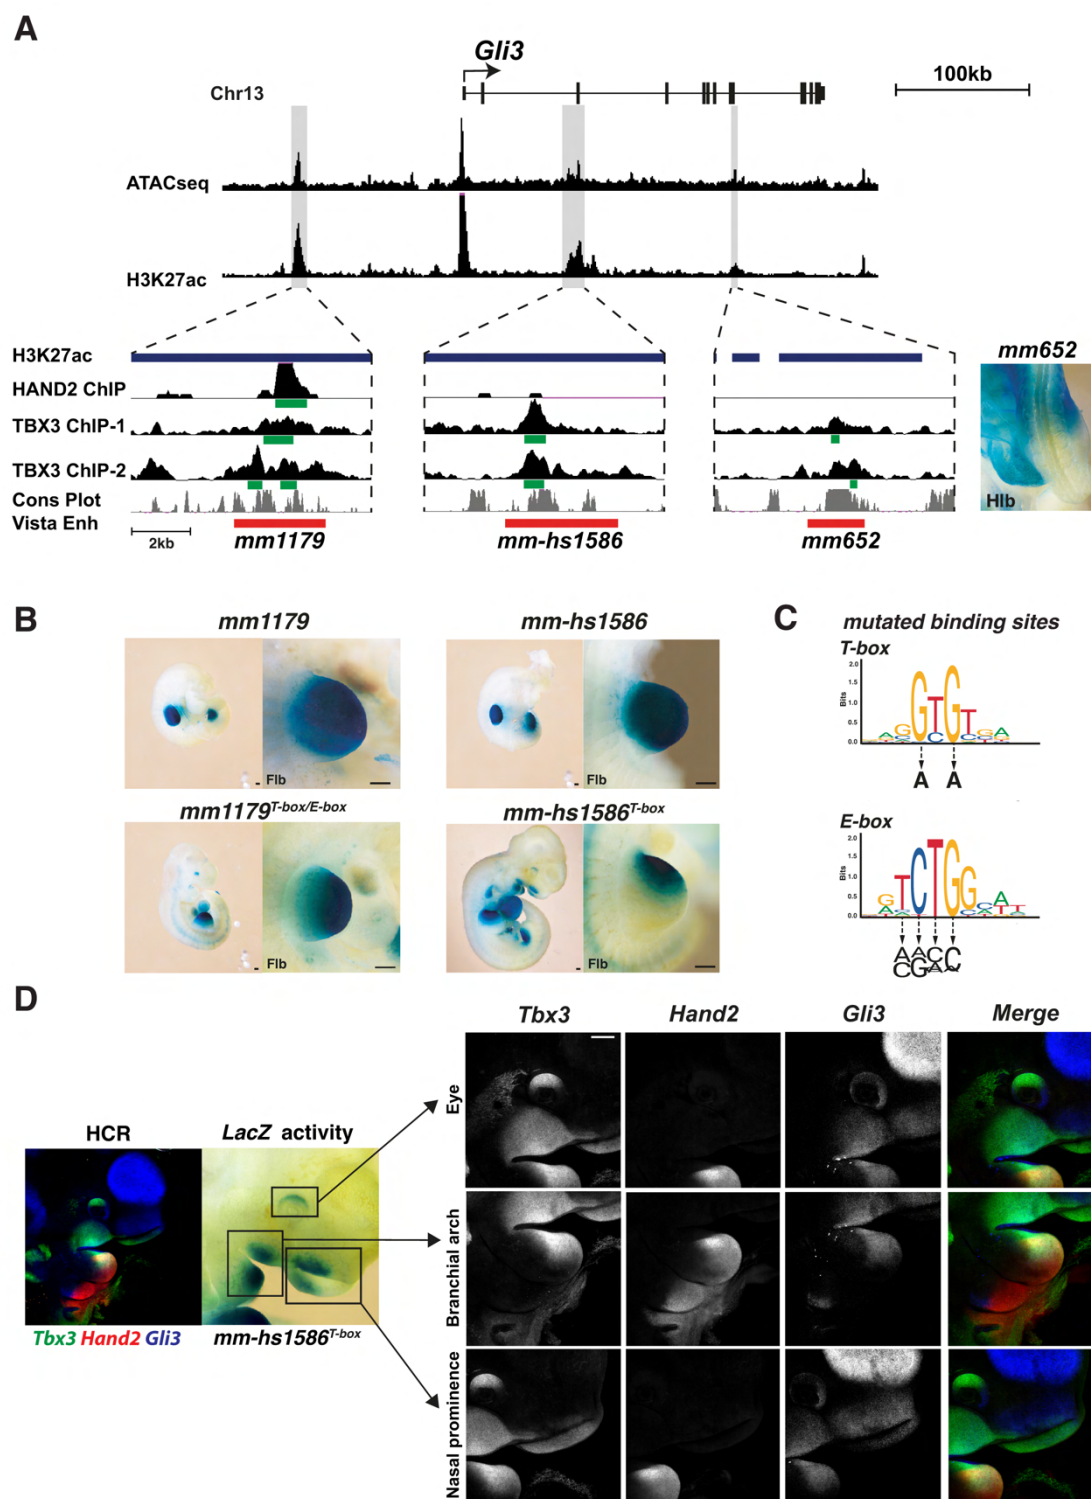

**Fig. S8. TBX3 and HAND2 bind to *Gli3* enhancers and their motif are necessary for their correct spatial activity.** (A) UCSC browser view of the *Gli3* genomic landscape with enlargements (below) of the relevant regions of accessible and active chromatin (ATAC-seq and H3K27ac peaks). The two limb enhancers *mm1179* and *mm-hs1586* plus a third potential enhancer *mm652* are highlighted (grey shading). The



enlargements below show of the genomic locations of the HAND2 and TBX3 ChIP-seq peaks mapping to these enhancers and the genomic regions tested for *Gli3* enhancer activity (red bars). The right-most panel shows the transient early activity of the *mm652 LacZ* reporter construct in hindlimb buds (Hlb) of a transgenic founder embryo at E10.5 (n=5/6). (B) Analysis of the *LacZ* reporter activity of the wild-type (*mm1179*: n=3; *hs-mm1586*: n=7; top panels) and mutant *mm1179* (n= 6) and *hs-mm1586* (n=11/13) enhancers (with mutated *T-box* and *E-box* motifs, lower panels) in transgenic mouse founder embryos at E10.5 (34-36 somites). Enlargements show forelimb buds (Flb). Scale bar: 200 $\mu$ m. (C) Scheme showing the base mutations to inactivate in the *E-box* and *T-box* motifs in the core regions of both enhancers (*mm1179*: 19 *E-box* motifs and 18 *T-box* motifs; *mm-hs1586*: 15 *T-box* motifs). (D) Several regions in the developing head (eye, nasal prominence and branchial arch show ectopic *LacZ* expression of the *hs-mm1586* enhancer with mutated *T-box* motifs (n=4). All these regions express *Tbx3* and *Gli3*, while *Hand2* expression is only detected in the 1<sup>st</sup> branchial arch. Scale bar: 200 $\mu$ m.

**A****mm1179\_ fragment 1 -repeat sequence- fragment 2: mutations of T-box and E-box motifs**

CCCTCACTAAAGGGAACAAAAGCTGGTACCGAAGAGTGTTACCGGCCTCTAAGTGAGACCTGGGAA  
 ATTAGCCCTTTTGTGAACTGATCTTAATTCCTTTGGGTACAAAATGTCCCCTCAGGAAAACAGGAC  
 TCACAGCCCTGGCCAATAAAGACCACCCCACTAATTAATTGAGTCATCTATATCTTGCAAGTGCAAG  
 ATGAAGCATTAAATCTAAATGTTTCATATTTTAAATAGAAACGGCCAAAGTCATGGGGGCTTCAATA  
 TGAATGTATTCCCGGTAAAAAAAAGTATCTACTAAAGAAAGCTTCCCGGGCTCAGGCAGAGCTCC  
 GGGTCCTCTGAAAATCAAATTTAAATGGCCCCGAGCAGCGGAGAACATATCTCCTCAGAAAAACAAC  
 GGGGCCTTTGTCTAATTGCCATTTATTACGGTTTTATCTCAGTCCCCCAAAGAAAAGGAAAAGAAG  
 GGGACTGATTTAGTCTCTTCATCCACAACCTTTAACGGGCATGTGGTTCTAATGAAGTCGAGACTTT  
 CGCCTAACGAAATGTAATAATAACTCCCCTAATTGAAAAGTAATAAAAACATCAAAAACAATATCAAT  
 TAGCCAGTGAAGGGCCCTTGCCTCTTTGAAGA CGGCTA GTGGTCCCGGAAAGTACTCTAAGCTA  
 TACAAGAGGACACACA

- repeat sequence (177bp)-

ACACCCCCATTTTCAAACGTTTCCTCGGGGAATGACAAGAAAGAGCATCCCTGGTTAATATCTAGCC  
 ACTAAATA TATATGAAATCTCTAACTTGGGCAAGATCCAAACATTCAA TAAAA GAATGGGGGGCCG  
 GATACCGTCAAATAATTAACAAAGGAGCATATCCGTTAATTATGATCTGAGAGTCAATAAAGTCATCT  
 GATGGCCCATTTAAGGGAAA TCATTAGAGAGTAGAATTTAGGGGCAAAGAACTGCAGGCTTTCCTTC  
 CTCCAAAAGCTACCATTTCATT AATATCTTCAAAAAGGATGAAGG CCCCCGCCGAGCCATTGCCCC  
 TAGAGAAGGGGCCTAAACCGGAACCTTCCATTTCTCATAATTGAGATCACGGGAATAATCAGCTCTC  
 TTTTTAAGAAACCAGCCAAGACTAAATGGCAGCAAGACTGCTGGAGGTGCAAAGTCACAGGCTTCAA  
 GAGTGATTTCCATGACCACATAGTGTGACTTGCTGATGGGGAAGTGGGCTGTGAAA  
 GATGTCTGCAGGACCCATGCAGTTCATTTTCTATGGATGGAATTGGTTTTTTGGGCTCTAGGATTC  
 AAGTCTCTTTAAGCAAGCAAAGCTGTAACAGAATACGTTTACCTCTGCTTTCTAGCTGCCAAAACAA  
 CAGAGGAGAGGGGTACCGAGCTCCAGGAACATCCAACTGA

**B****mm-hs1586 mutations of T-box motifs**

GTGTGTGTGTGTGAATAGTTTTGGGTATTCCAATGCTTAGTGATTTGTGGAACAAACTAATTTTAA  
 GAAT TCAATACTA AATTTGTTACTATGGAAGTTTTTATTGTGAGCCCACTCTCCTTATGAGCCTGCC  
 AGAGACACTGGAAGTCGCCTTTCTAGTCCTAACTGAATTAAGAAATTAAGCAGGCCTCTTGGAGTA  
 TAAGTCTAGGACAGTTCCTTTCAAAGGCAGCCTATAAGGTAATCCATACGGGTTGAGTTTACCTCA  
 GGCCTGTTTCTGGTTTAAGAATATAATTTGGCTCTGGAGTAATGAAAGTCATGTT GAGATAGCA AAG  
 CTGGAAGCTCCTGATTACAGATT TATAAACTT GCCAGGAAATAGGCTCGCCATTTAACCTTCTGCC  
 TCCAGTTCAGATGATCCATTGAGCTCCAGAGAAAGAGA CTGATATGT TTCCCTTT TCCAAAATC GT  
 TCAGAAAT TTTAATATT TAAGGCAAAGGTCATTATCCAGATGACTGATTAGTGAGGACAGCTGATT  
 AG AGCATATTA TTTTGTCAAGAAAATACCCAGGATAAAAAGCTAATTTTATCCCTTCAATTAGTTGGCT  
 GCAAGCAAGGGGAAGGCTC ACTTATTCC TCAGATCA AAGAGACTC GAAGCAACCTTAAGTTCCAGC  
 AACTGCTTCT CCTATCAG AATATGTTGGTGGAAAATATGGCTATGCAATAGTTTCTAAGTAGAAAGGA  
 CAGTTTTTGTGAGAAGCATGAAAATACGATTGTTTGGATTTTGGGGAGGGGCAGTGTTTGGCTTTTA  
 AAAAGTTAATTGCTTTTCTTGAATAAAAATTTCCATTGGTCCCATTATTGAAAAGATATCT GTTGAAG  
 CAGAAACAAAGACAGAGGGGTTTGGACAACATACTTCTCCTTCTCCTTTTCCAGGCTTACTTCAATTTGT  
 TTTTCTTACTTTTAGGAAGGAAGATTTAAAATAATATTG TAGGATGTTTTACTCTGGTCACATTTT  
 GAAGTCTTATGTTATATT TTTATTTGTGGTCTCTTTTGGAGTATCATTATGCAGAAACAGTAGGGATTC  
 CTATAGAGTCCCACCTGGGTTTATATCCGCATGTTAAGTACACTCACTGTGCTGTTTAAAGCTGC  
 CCACAAGCTCCTCCAGTGTTTGTATTTCTGTGTGAACACAAGCTTTTCCCATCACAGCGATGTTTT  
 GTTTTGTTTTTCCAATGCCCACTAATTAGTGAGGTGTTAATTAGTCCAGACAGCTGATGAGCACTT  
 CTTTCTATTGGCTGATGGTAGTGAACCGTTAACTTTCTATCCAGTTTGCAGCTTGTCTTGCCTCCT  
 TTGTTTTAACGGTTTCCCACCCAGGCGTCTCTCCATCCTTTGAGGGACTGGCTTTCCCGTCACTGGA  
 ACCCCTGTTCTCACCCAGTGGTCTGTGTGACCCATTTGCTGGTTCACCAAATAATGTTAACGAACA  
 CTGCCTGGAGATCAAATATTATGGTTTAGACTTATTTATTGCTTTCTAGTTTGAAGATATTGACTTGT  
 AAGTTGGTTATTCTTGTGATTTTCTACGTTACTATACAAGTGAATGTAGAAGTAACCTCCAGTCTT  
 GAGCTGGAGCCCCTCGGCAAGTCAGTGTGAGTCCCCACCCCAAATGTTTTCCCTACCTTGGGG  
 ACATTGTGTAGATAGCTATGTGCAGAAAGCCTAGAAAACCTGAACAGACTGGCGGTACCGAGCTCCA  
 GGAACATCCAACTGA

**Fig. S9. Sequence of the mm1179 and mm-hs1586 *Gli3* enhancers with the nucleotide mutations in T-box and E-box motifs.** (A) Mutated *mm1179* core regions with all nucleotide changes shown in bold. (B) Mutated *mm-hs1586* core region with all nucleotide changes shown in bold. T-box motifs are indicated in yellow and E-boxes are underlined.

**Table S1. Annotation of curated TBX3 ChIP-seq peaks to nearest promoter and genomic features.**

Available for download at  
<https://journals.biologists.com/dev/article-lookup/doi/10.1242/dev.202722#supplementary-data>

**Table S2. Association of the curated TBX3 ChIP-seq peaks to the two nearest genes (range  $\leq 1$ Mb).**

Available for download at  
<https://journals.biologists.com/dev/article-lookup/doi/10.1242/dev.202722#supplementary-data>

**Table S3. List of differentially expressed genes between wildtype and *Tbx3*<sup>ΔΔ</sup> limb buds at E9.75-10.0.**

Available for download at  
<https://journals.biologists.com/dev/article-lookup/doi/10.1242/dev.202722#supplementary-data>

**Table S4. List of differentially expressed TBX3 target genes.**

Available for download at  
<https://journals.biologists.com/dev/article-lookup/doi/10.1242/dev.202722#supplementary-data>

**Table S5. Manually curated functional annotation of TBX3 target genes.** Grey shaded genes are expressed during limb bud development. Genes indicated in bold are transcription factors.

Available for download at  
<https://journals.biologists.com/dev/article-lookup/doi/10.1242/dev.202722#supplementary-data>

**Table S6. TBX3 target genes that are also differentially expressed in wildtype versus *Shh*-deficient limb buds at E10.5.**

Available for download at  
<https://journals.biologists.com/dev/article-lookup/doi/10.1242/dev.202722#supplementary-data>

**Table S7. List of differentially expressed genes between wildtype and *Hand2*<sup>ΔΔ</sup> limb buds at E9.75-10.0.**

Available for download at  
<https://journals.biologists.com/dev/article-lookup/doi/10.1242/dev.202722#supplementary-data>

**Table S8. List of differentially expressed HAND2 target genes.**

Available for download at  
<https://journals.biologists.com/dev/article-lookup/doi/10.1242/dev.202722#supplementary-data>

**Table S9. Shared TBX3 and HAND2 target genes.**

Available for download at  
<https://journals.biologists.com/dev/article-lookup/doi/10.1242/dev.202722#supplementary-data>

**Table S10. Primers for genotyping mouse strains.**

Available for download at  
<https://journals.biologists.com/dev/article-lookup/doi/10.1242/dev.202722#supplementary-data>

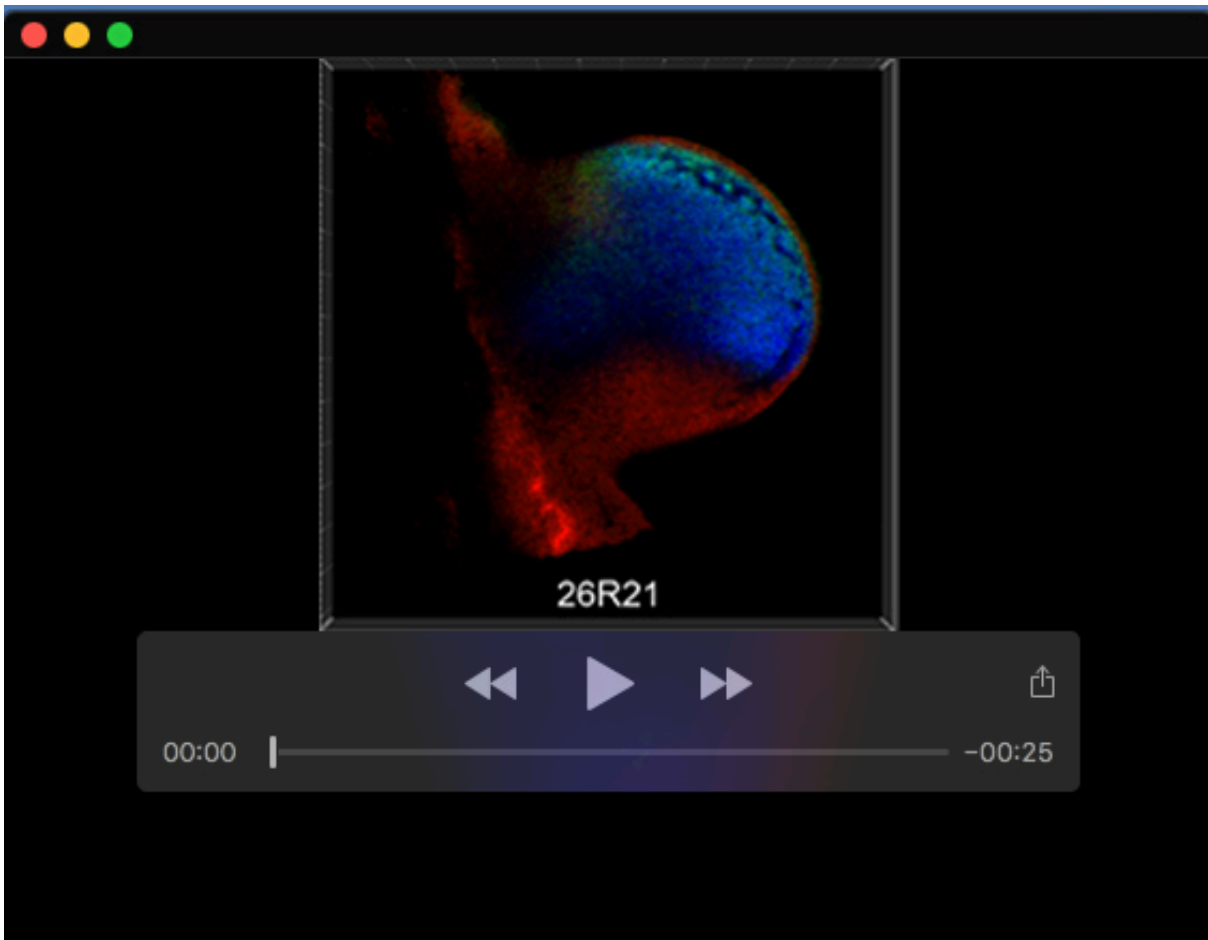

**Movie 1.** HCR<sup>TM</sup> analysis of a wild-type mouse limb bud at E10.5 (35 somites) showing the spatial expression of endogenous *Tbx3* (red), *Gli3* (green) and the transgenic *mm-hs1586-LacZ* reporter (blue).

Limb buds are oriented with anterior to the top and posterior to the bottom, proximal to the left and distal to the right. The movies show scans through the z-stacks in ventral to dorsal direction. These scans through the entire limb bud mesenchyme show that the wildtype *Tbx3* expression does not significantly overlap the spatially identical *Gli3* and *LacZ* expression domains.

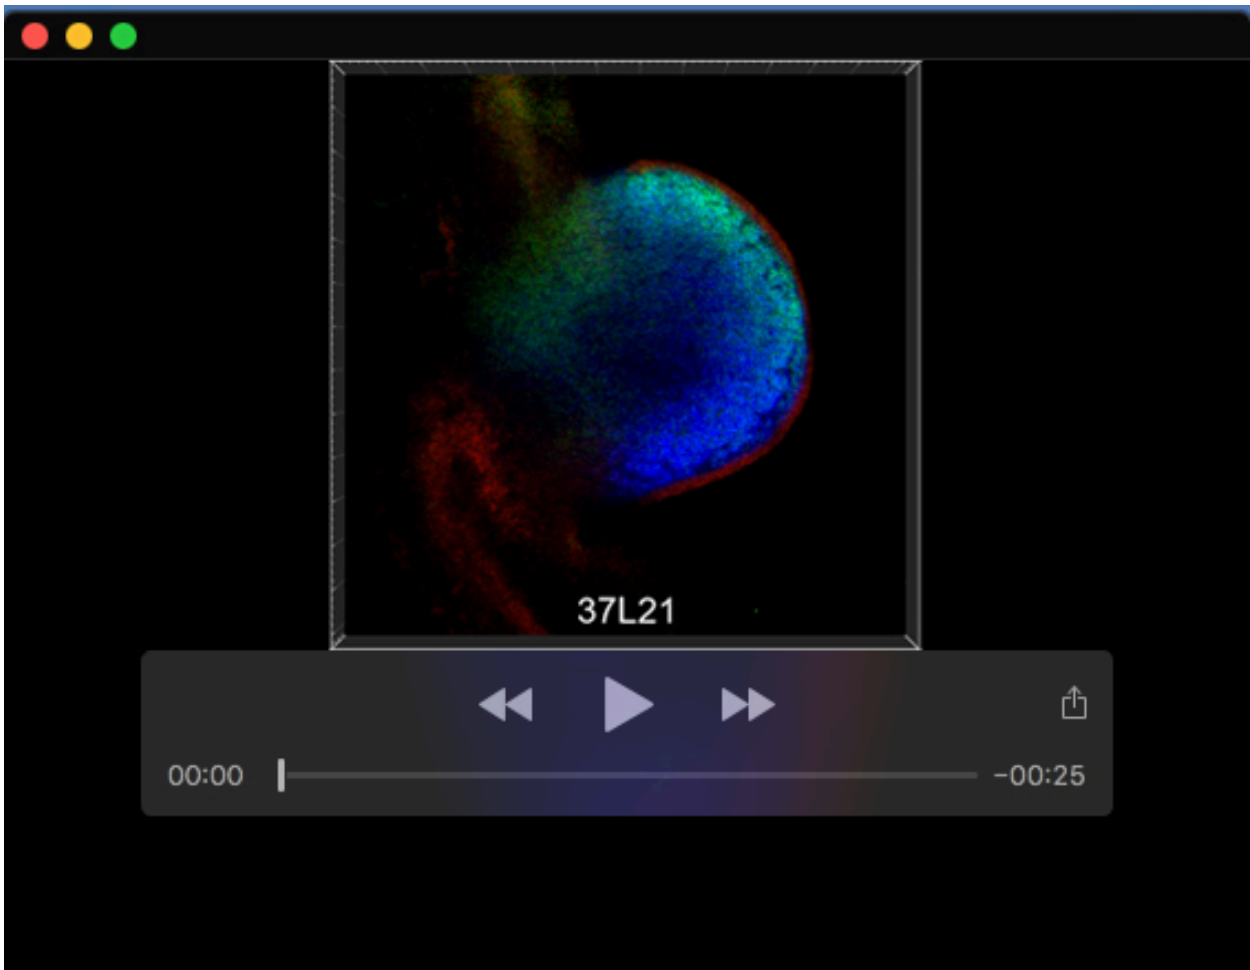

**Movie 2.** HCR™ analysis of a *Tbx3*<sup>Δ/Δc</sup> mouse limb bud at E10.5 showing the spatial expression *Tbx3* (red), *Gli3* (green) and the transgenic *mm-hs1586-LacZ* reporter (blue).

Limb buds are oriented with anterior to the top and posterior to the bottom, proximal to the left and distal to the right. The movies show scans through the z-stacks in ventral to dorsal direction. These scans through the entire limb bud mesenchyme show that the wildtype *Tbx3* expression does not significantly overlap the spatially identical *Gli3* and *LacZ* expression domains.
